# Supplementary material for: Comparing the genomes of Helicobacter pylori clinical strain UM032 and Mice-adapted derivatives
Source: PubMed Central journal article supplement (PMC3751790; doi:10.1186/1757-4749-5-25), 2013-08-19
Supplement: 1757-4749-5-25-S1.pdf [file 1757-4749-5-25-S1.pdf]

# Reports for Job hp32

SMRT Cells: 8 Movies: 8

## Overview

| Job Metric                              | Value     |
|-----------------------------------------|-----------|
| Adapter Dimers (%)                      | 0.39      |
| Short Inserts (%)                       | 0.09      |
| Post-Filter Polymerase Read Bases       | 567089444 |
| Post-Filter Polymerase Reads            | 214554    |
| Post-Filter Polymerase Read Length      | 2643      |
| Post-Filter Polymerase Read Quality     | 0.857     |
| Polished Contigs                        | 1         |
| N50 Contig Length                       | 1599441   |
| Sum of Contig Lengths                   | 1599441   |
| Mapped Reads                            | 184857    |
| Mapped Read Length of Insert            | 2084      |
| Reference Length - scf718000000002      | 1601272   |
| Bases Called (%) - scf718000000002      | 100.00    |
| Consensus Concordance - scf718000000002 | 99.8876   |
| Coverage - scf718000000002              | 269.19    |

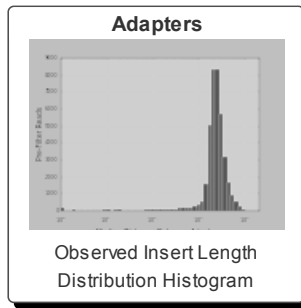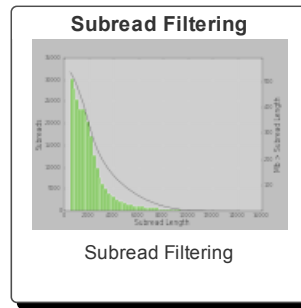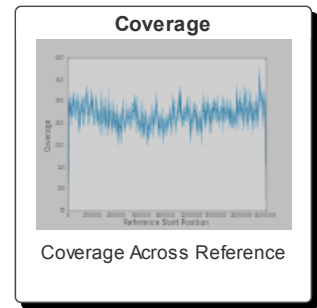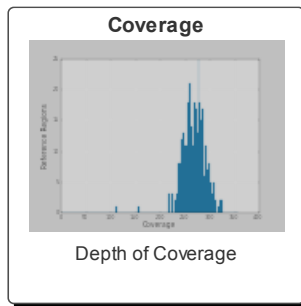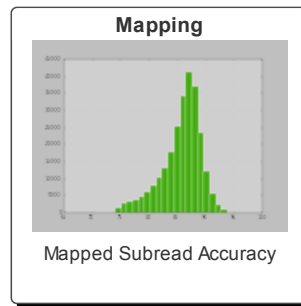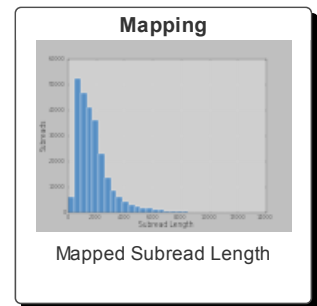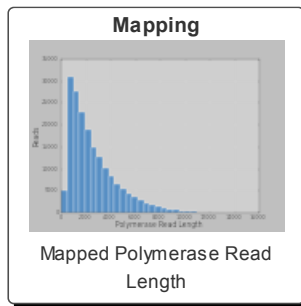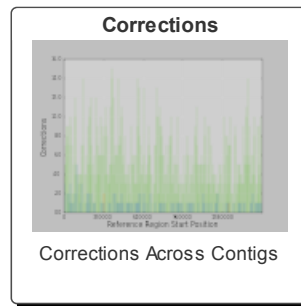

## Filtering

|                         | Pre-Filter   | Post-Filter  |
|-------------------------|--------------|--------------|
| Polymerase Read Bases   | 737408468 bp | 567089444 bp |
| Polymerase Reads        | 601224       | 214554       |
| Polymerase Read Length  | 1227 bp      | 2643 bp      |
| Polymerase Read Quality | 0.386        | 0.857        |

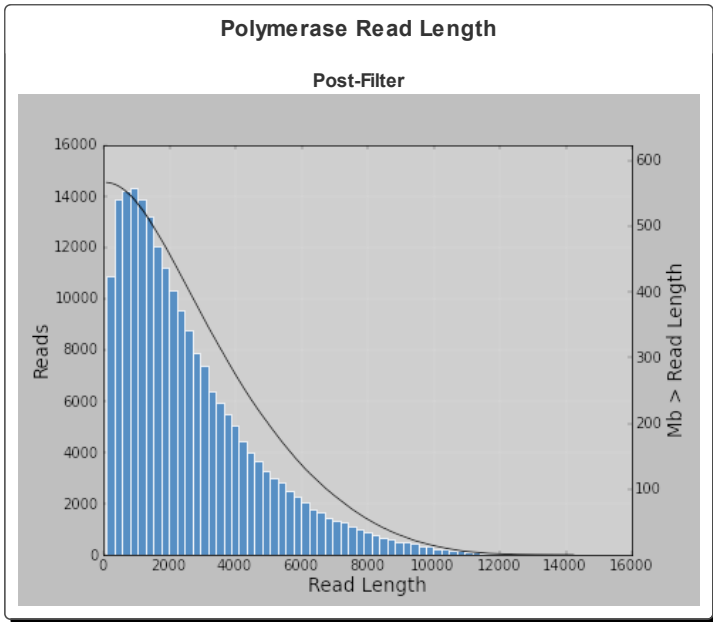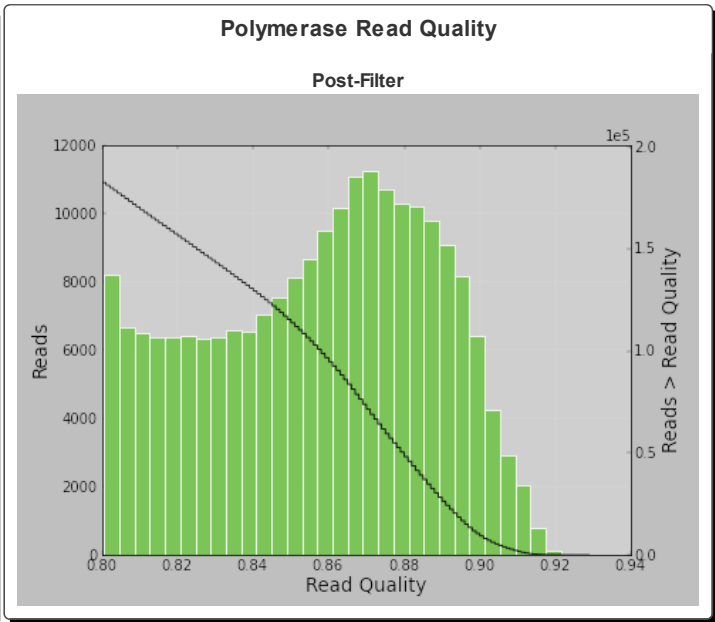

### Subread Filtering

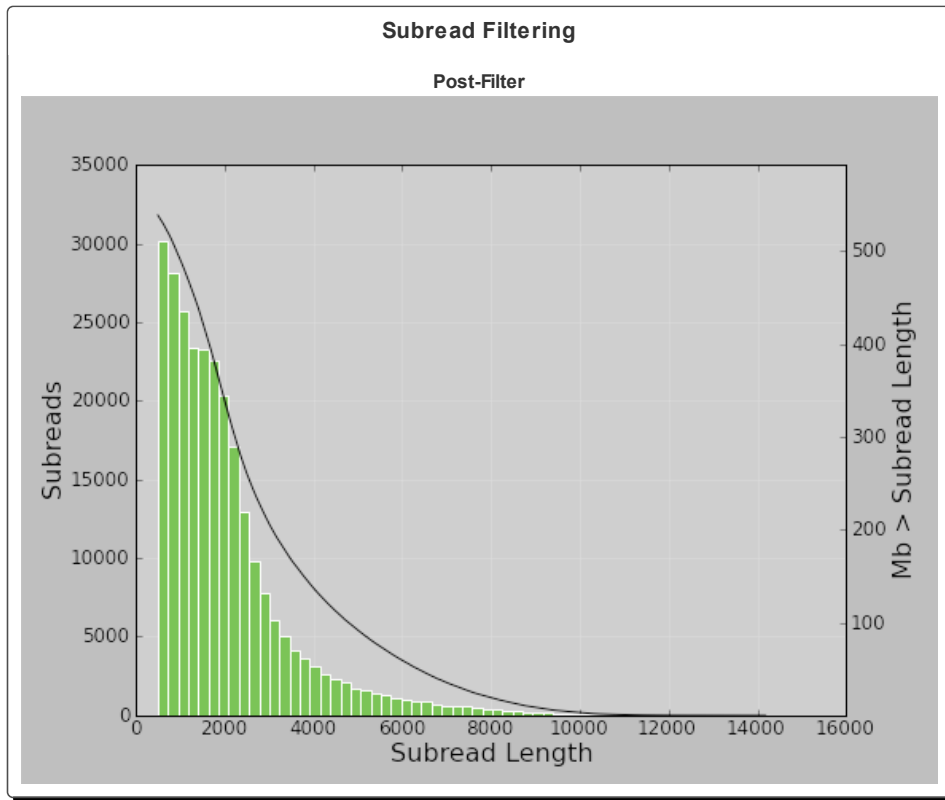

### Adapters

Adapter Dimers (%) 0.39 %  
Short Inserts (%) 0.09 %

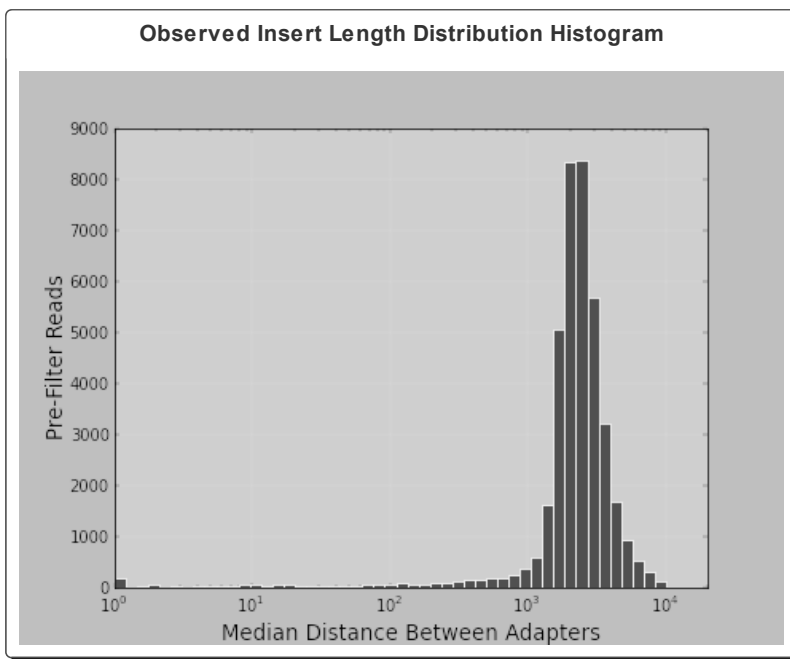

### Loading

| SMRT Cell ID                                            | Productive ZMWs | Productivity 0 (%) | Productivity 1 (%) | Productivity 2 (%) |
|---------------------------------------------------------|-----------------|--------------------|--------------------|--------------------|
| m120811_055117_42142_c100407420070000001523036611231251 | 75153           | 23.6               | 52.9               | 23.6               |
| m120811_035516_42142_c100407420070000001523036611231250 | 75153           | 18.5               | 58.5               | 23.0               |
| m120811_074621_42142_c100407420070000001523036611231252 | 75153           | 25.5               | 52.3               | 22.2               |
| m120811_172446_42142_c100354232550000001523024909301255 | 75153           | 36.7               | 37.8               | 25.5               |
| m120811_133139_42142_c100361060070000001523019709161212 | 75153           | 34.6               | 36.3               | 29.1               |
| m120811_153010_42142_c100354232550000001523024909301254 | 75153           | 37.9               | 36.3               | 25.8               |
| m120811_094153_42142_c100361060070000001523019709161210 | 75153           | 32.7               | 42.9               | 24.4               |
| m120811_113638_42142_c100361060070000001523019709161211 | 75153           | 31.7               | 42.8               | 25.5               |

### Pre-Assembly

|                           |           |                     |          |
|---------------------------|-----------|---------------------|----------|
| Polymerase Read Bases     | 539606414 | Length Cutoff       | 6322     |
| Seed Bases                | 51001157  | Pre-Assembled Bases | 34805331 |
| Pre-Assembled Yield       | .682      | Pre-Assembled Reads | 6241     |
| Pre-Assembled Read Length | 5576      | Pre-Assembled N50   | 6393     |

### Polished Assembly

|                   |         |                       |         |
|-------------------|---------|-----------------------|---------|
| Polished Contigs  | 1       | Max Contig Length     | 1599441 |
| N50 Contig Length | 1599441 | Sum of Contig Lengths | 1599441 |

### Top Corrections

| Sequence         | Position | Correction          | Type | Coverage | Confidence | Genotype |
|------------------|----------|---------------------|------|----------|------------|----------|
| scf7180000000002 | 199706   | 199706_199707insT   | INS  | 100      | 51         | haploid  |
| scf7180000000002 | 824949   | 824949delAC         | DEL  | 100      | 51         | haploid  |
| scf7180000000002 | 1123564  | 1123564_1123565insT | INS  | 100      | 51         | haploid  |
| scf7180000000002 | 1310635  | 1310635_1310636insA | INS  | 100      | 51         | haploid  |
| scf7180000000002 | 1521609  | 1521609_1521610insA | INS  | 100      | 51         | haploid  |
| scf7180000000002 | 582      | 582_583insA         | INS  | 15       | 50         | haploid  |
| scf7180000000002 | 21358    | 21358delA           | DEL  | 100      | 50         | haploid  |
| scf7180000000002 | 23074    | 23074_23075insA     | INS  | 100      | 50         | haploid  |
| scf7180000000002 | 49701    | 49701delA           | DEL  | 100      | 50         | haploid  |
| scf7180000000002 | 54434    | 54434_54435insT     | INS  | 100      | 50         | haploid  |
| scf7180000000002 | 56419    | 56419delT           | DEL  | 100      | 50         | haploid  |
| scf7180000000002 | 63141    | 63141delA           | DEL  | 100      | 50         | haploid  |
| scf7180000000002 | 82160    | 82160_82161insA     | INS  | 100      | 50         | haploid  |
| scf7180000000002 | 102844   | 102844_102845insA   | INS  | 100      | 50         | haploid  |
| scf7180000000002 | 123562   | 123562delT          | DEL  | 100      | 50         | haploid  |

|                 |         |                     |     |     |    |         |
|-----------------|---------|---------------------|-----|-----|----|---------|
| scf718000000002 | 142622  | 142622_142623insA   | INS | 100 | 50 | haploid |
| scf718000000002 | 147011  | 147011delA          | DEL | 100 | 50 | haploid |
| scf718000000002 | 161385  | 161385delCG         | DEL | 100 | 50 | haploid |
| scf718000000002 | 175288  | 175288delA          | DEL | 100 | 50 | haploid |
| scf718000000002 | 177938  | 177938delG          | DEL | 100 | 50 | haploid |
| scf718000000002 | 190753  | 190753_190754insA   | INS | 100 | 50 | haploid |
| scf718000000002 | 196962  | 196962delT          | DEL | 100 | 50 | haploid |
| scf718000000002 | 237461  | 237461delT          | DEL | 100 | 50 | haploid |
| scf718000000002 | 256983  | 256983delT          | DEL | 100 | 50 | haploid |
| scf718000000002 | 282782  | 282782delT          | DEL | 100 | 50 | haploid |
| scf718000000002 | 298509  | 298509delT          | DEL | 100 | 50 | haploid |
| scf718000000002 | 356906  | 356906_356907insT   | INS | 100 | 50 | haploid |
| scf718000000002 | 378962  | 378962delA          | DEL | 100 | 50 | haploid |
| scf718000000002 | 408643  | 408643delT          | DEL | 100 | 50 | haploid |
| scf718000000002 | 461247  | 461247_461248insA   | INS | 100 | 50 | haploid |
| scf718000000002 | 463716  | 463716_463717insA   | INS | 100 | 50 | haploid |
| scf718000000002 | 469643  | 469643_469644insT   | INS | 100 | 50 | haploid |
| scf718000000002 | 478782  | 478782delGC         | DEL | 100 | 50 | haploid |
| scf718000000002 | 483089  | 483089_483090insT   | INS | 100 | 50 | haploid |
| scf718000000002 | 506587  | 506587delC          | DEL | 100 | 50 | haploid |
| scf718000000002 | 521929  | 521929_521930insA   | INS | 100 | 50 | haploid |
| scf718000000002 | 533511  | 533511delA          | DEL | 100 | 50 | haploid |
| scf718000000002 | 554314  | 554314delA          | DEL | 100 | 50 | haploid |
| scf718000000002 | 564768  | 564768delA          | DEL | 100 | 50 | haploid |
| scf718000000002 | 576289  | 576289delA          | DEL | 100 | 50 | haploid |
| scf718000000002 | 595774  | 595774delA          | DEL | 100 | 50 | haploid |
| scf718000000002 | 612338  | 612338delT          | DEL | 100 | 50 | haploid |
| scf718000000002 | 623387  | 623387delT          | DEL | 100 | 50 | haploid |
| scf718000000002 | 626399  | 626399_626400insA   | INS | 100 | 50 | haploid |
| scf718000000002 | 653053  | 653053_653054insA   | INS | 100 | 50 | haploid |
| scf718000000002 | 696449  | 696449_696450insA   | INS | 100 | 50 | haploid |
| scf718000000002 | 748721  | 748721delA          | DEL | 100 | 50 | haploid |
| scf718000000002 | 748767  | 748767delG          | DEL | 100 | 50 | haploid |
| scf718000000002 | 761425  | 761425delT          | DEL | 100 | 50 | haploid |
| scf718000000002 | 865559  | 865559delT          | DEL | 100 | 50 | haploid |
| scf718000000002 | 866317  | 866317_866318insA   | INS | 100 | 50 | haploid |
| scf718000000002 | 904267  | 904267delT          | DEL | 100 | 50 | haploid |
| scf718000000002 | 919520  | 919520_919521insA   | INS | 100 | 50 | haploid |
| scf718000000002 | 938580  | 938580_938581insT   | INS | 100 | 50 | haploid |
| scf718000000002 | 957572  | 957572delA          | DEL | 100 | 50 | haploid |
| scf718000000002 | 1109013 | 1109013delA         | DEL | 100 | 50 | haploid |
| scf718000000002 | 1109812 | 1109812delA         | DEL | 100 | 50 | haploid |
| scf718000000002 | 1176044 | 1176044delA         | DEL | 100 | 50 | haploid |
| scf718000000002 | 1200505 | 1200505delT         | DEL | 100 | 50 | haploid |
| scf718000000002 | 1206161 | 1206161delA         | DEL | 100 | 50 | haploid |
| scf718000000002 | 1215931 | 1215931delT         | DEL | 100 | 50 | haploid |
| scf718000000002 | 1218266 | 1218266delG         | DEL | 100 | 50 | haploid |
| scf718000000002 | 1239389 | 1239389_1239390insT | INS | 100 | 50 | haploid |
| scf718000000002 | 1329616 | 1329616delT         | DEL | 100 | 50 | haploid |
| scf718000000002 | 1345476 | 1345476delT         | DEL | 100 | 50 | haploid |
| scf718000000002 | 1468082 | 1468082delA         | DEL | 100 | 50 | haploid |
| scf718000000002 | 1474148 | 1474148delCA        | DEL | 100 | 50 | haploid |
| scf718000000002 | 1495368 | 1495368delT         | DEL | 100 | 50 | haploid |
| scf718000000002 | 1503914 | 1503914delTC        | DEL | 100 | 50 | haploid |
| scf718000000002 | 1518510 | 1518510delT         | DEL | 100 | 50 | haploid |
| scf718000000002 | 1580121 | 1580121delT         | DEL | 100 | 50 | haploid |
| scf718000000002 | 665     | 665_666insA         | INS | 21  | 49 | haploid |
| scf718000000002 | 966     | 966_967insC         | INS | 22  | 49 | haploid |
| scf718000000002 | 3854    | 3854delG            | DEL | 98  | 49 | haploid |
| scf718000000002 | 10599   | 10599delT           | DEL | 100 | 49 | haploid |
| scf718000000002 | 12612   | 12612delT           | DEL | 100 | 49 | haploid |

Reports for Job hp32

|                  |       |                 |     |     |    |         |
|------------------|-------|-----------------|-----|-----|----|---------|
| scf7180000000002 | 13102 | 13102delI       | DEL | 100 | 49 | haploid |
| scf7180000000002 | 14909 | 14909delT       | DEL | 100 | 49 | haploid |
| scf7180000000002 | 21911 | 21911delC       | DEL | 100 | 49 | haploid |
| scf7180000000002 | 23281 | 23281_23282insT | INS | 100 | 49 | haploid |
| scf7180000000002 | 24724 | 24724delT       | DEL | 100 | 49 | haploid |
| scf7180000000002 | 25921 | 25921delA       | DEL | 100 | 49 | haploid |
| scf7180000000002 | 26496 | 26496delA       | DEL | 100 | 49 | haploid |
| scf7180000000002 | 27829 | 27829delA       | DEL | 100 | 49 | haploid |
| scf7180000000002 | 38634 | 38634_38635insA | INS | 100 | 49 | haploid |
| scf7180000000002 | 45647 | 45647delT       | DEL | 100 | 49 | haploid |
| scf7180000000002 | 52595 | 52595delT       | DEL | 100 | 49 | haploid |
| scf7180000000002 | 53148 | 53148delA       | DEL | 100 | 49 | haploid |
| scf7180000000002 | 53216 | 53216_53217insT | INS | 100 | 49 | haploid |
| scf7180000000002 | 58037 | 58037delG       | DEL | 100 | 49 | haploid |
| scf7180000000002 | 59926 | 59926delA       | DEL | 100 | 49 | haploid |
| scf7180000000002 | 62472 | 62472delA       | DEL | 100 | 49 | haploid |
| scf7180000000002 | 78599 | 78599delT       | DEL | 100 | 49 | haploid |
| scf7180000000002 | 86708 | 86708delA       | DEL | 100 | 49 | haploid |
| scf7180000000002 | 86719 | 86719delT       | DEL | 100 | 49 | haploid |
| scf7180000000002 | 87871 | 87871_87872insA | INS | 100 | 49 | haploid |
| scf7180000000002 | 87962 | 87962delA       | DEL | 100 | 49 | haploid |
| scf7180000000002 | 88370 | 88370delTT      | DEL | 100 | 49 | haploid |
| scf7180000000002 | 89275 | 89275delT       | DEL | 100 | 49 | haploid |
| scf7180000000002 | 92843 | 92843delT       | DEL | 100 | 49 | haploid |

Corrections

| Reference        | Reference Length | Bases Called (%) | Consensus Concordance | Coverage |
|------------------|------------------|------------------|-----------------------|----------|
| scf7180000000002 | 1601272          | 100.00           | 99.8876               | 269.19   |

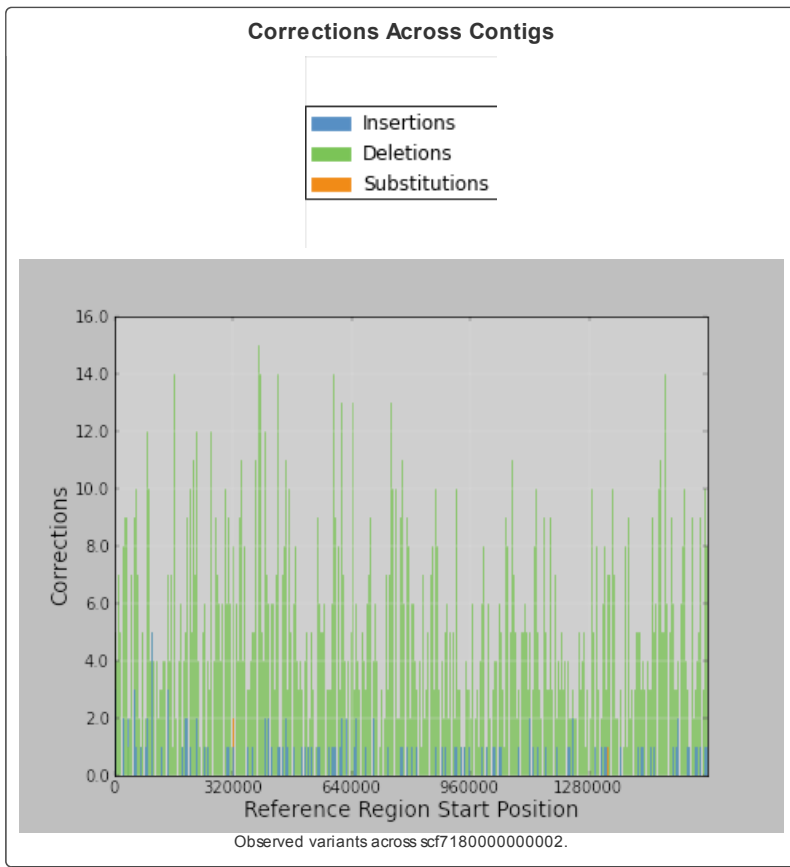

Coverage

|                   |        |
|-------------------|--------|
| Coverage          | 269.19 |
| Missing Bases (%) | 0.00   |

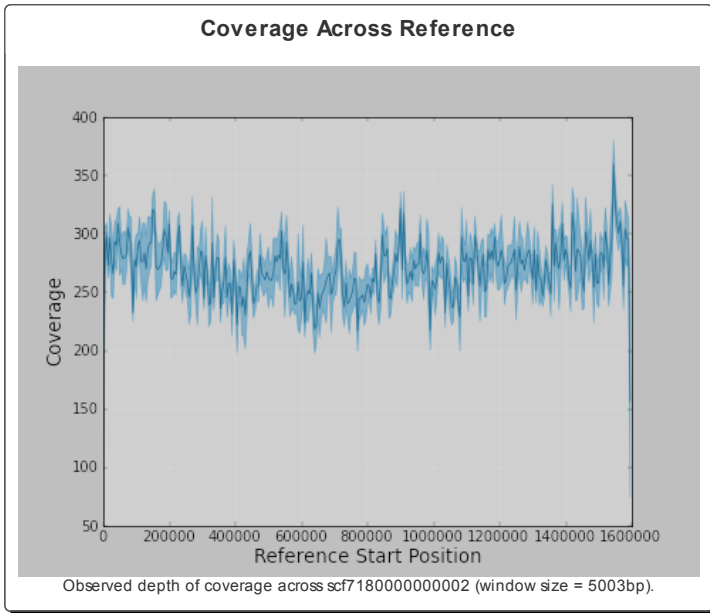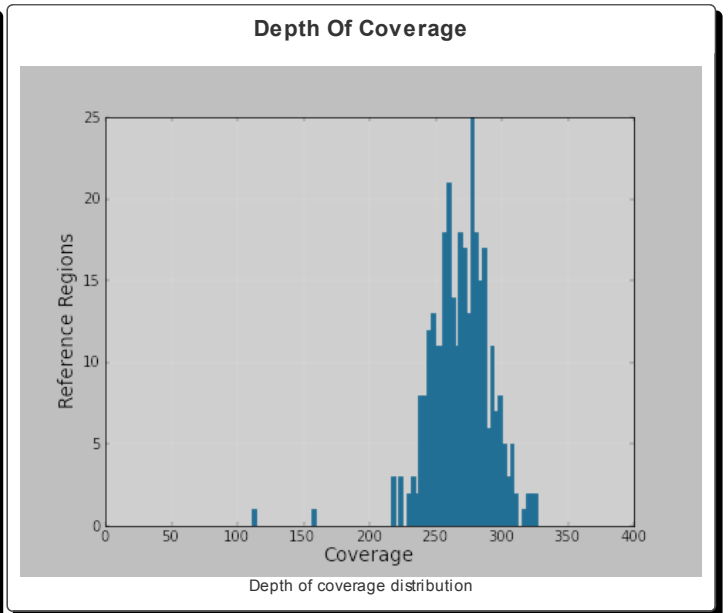

### Mapping

Post-Filter Reads 214554 Mapped Polymerase Read Length 95% 6788 bp  
 Mapped Read Length of Insert 2084 bp Mapped Polymerase Read Length Max 14239 bp

|                                          | Mapped Reads | Mapped Polymerase Read Length | Mapped Subreads | Mapped Subread Bases | Mapped Subread Length | Mapped Subread Accuracy |
|------------------------------------------|--------------|-------------------------------|-----------------|----------------------|-----------------------|-------------------------|
| All Movies                               | 184857       | 2655 bp                       | 254556          | 474259085 bp         | 1863 bp               | 85.69%                  |
| c100407420070000001523036611231251_s1_p0 | 27908        | 2897 bp                       | 40447           | 77686343             | 1920 bp               | 85.58%                  |
| c100354232550000001523024909301254_s1_p0 | 15976        | 2759 bp                       | 21722           | 43084337             | 1983 bp               | 85.77%                  |
| c100354232550000001523024909301255_s1_p0 | 17201        | 2619 bp                       | 23131           | 43870628             | 1896 bp               | 85.71%                  |
| c100361060070000001523019709161210_s1_p0 | 22644        | 2398 bp                       | 29965           | 52630285             | 1756 bp               | 85.79%                  |
| c100407420070000001523036611231250_s1_p0 | 31380        | 2878 bp                       | 45172           | 86640754             | 1918 bp               | 85.66%                  |
| c100361060070000001523019709161211_s1_p0 | 23017        | 2320 bp                       | 29705           | 51655770             | 1738 bp               | 85.65%                  |
| c100361060070000001523019709161212_s1_p0 | 19316        | 2305 bp                       | 24736           | 43258009             | 1748 bp               | 85.79%                  |
| c100407420070000001523036611231252_s1_p0 | 27415        | 2855 bp                       | 39678           | 75432959             | 1901 bp               | 85.66%                  |

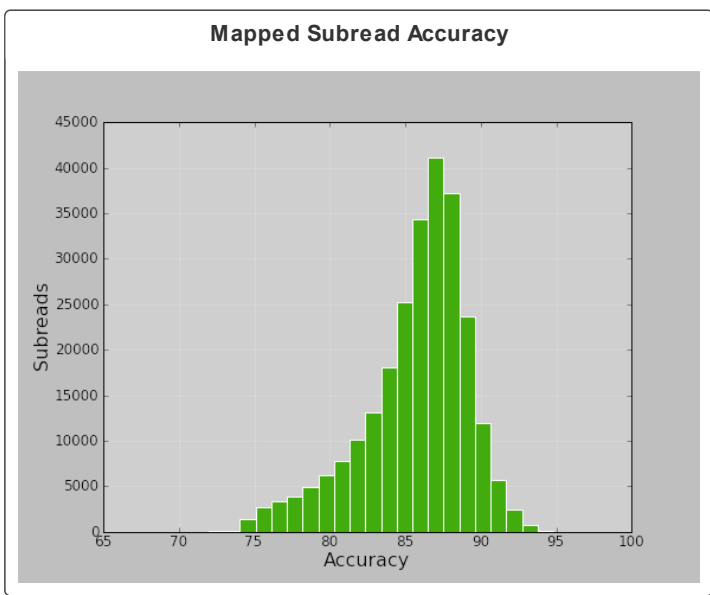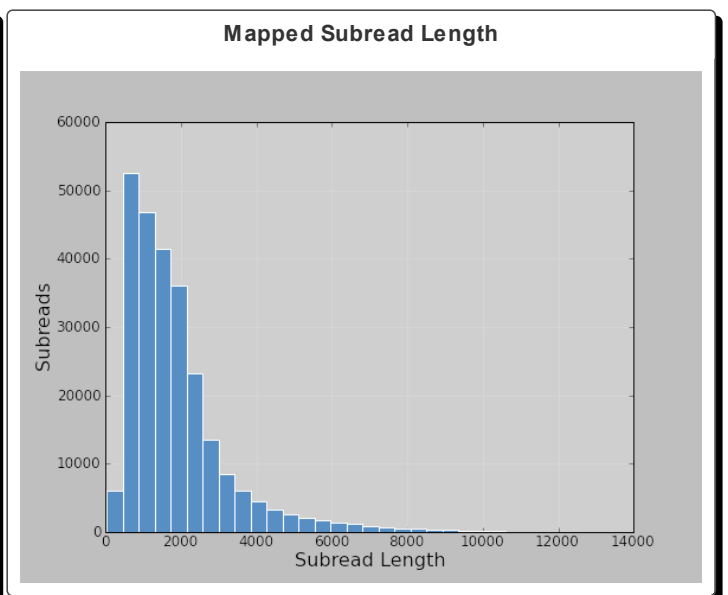

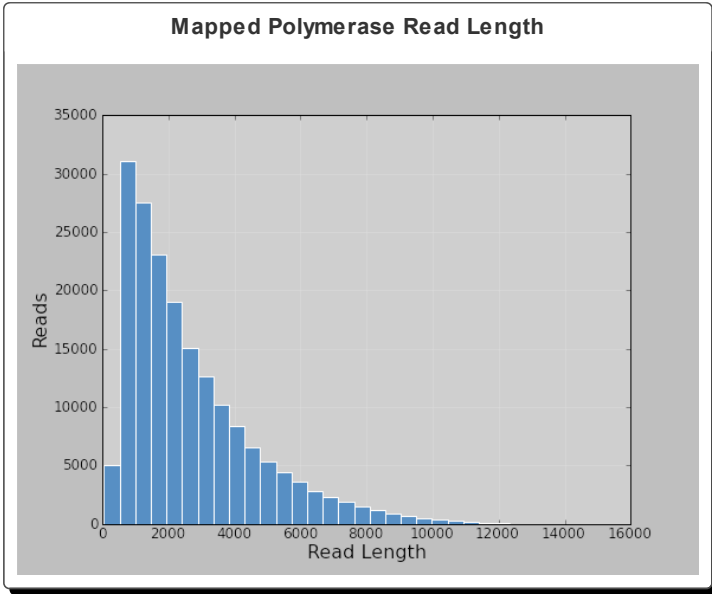

---

Generated by SMRT® Portal. Tue Jun 04 21:11:35 PDT 2013  
For Research Use Only. Not for use in diagnostic procedures.
